# Supplementary material for: Marginal Impact of Brown Seaweed Ascophyllum nodosum and Fucus vesiculosus Extract on Metabolic and Inflammatory Response in Overweight and Obese Prediabetic Subjects
Source: MDPI journal article supplement (doi:10.3390/md20030174), 2022-02-26
Supplement: s1 [file s1]

# Marginal Impact of Brown Seaweed *Ascophyllum nodosum* and *Fucus vesiculosus* eExtract on Metabolic and Inflammatory Response in Overweight and Obese Prediabetic Subjects

Marlène Vodouhè <sup>1</sup>, Julie Marois <sup>2</sup>, Valérie Guay <sup>2</sup>, Nadine Leblanc <sup>2</sup>, Stanley John Weisnagel <sup>3</sup>, Jean-François Bilodeau <sup>3</sup> and Hélène Jacques <sup>1,\*</sup>

Supplemental Table S1. Subjects' characteristics

| Variables                  | Brown seaweed extract<br>( <i>n</i> = 27) | Placebo<br>( <i>n</i> = 29) | P    |
|----------------------------|-------------------------------------------|-----------------------------|------|
| Men/women (n/n)            | 11/16                                     | 11/18                       | -    |
| Age (years)                | 55±12                                     | 51±11                       | 0.22 |
| Weight (kg)                | 91±13                                     | 91±13                       | 0.89 |
| BMI (Kg/m <sup>2</sup> )   | 33±4                                      | 33±4                        | 0.89 |
| Waist circumference (cm)   | 109±11                                    | 107±9                       | 0.49 |
| Hip circumference (cm)     | 113±2                                     | 115±2                       | 0.38 |
| SBP (mmHg)                 | 126±14                                    | 122±13                      | 0.32 |
| DBP (mmHg)                 | 76±10                                     | 76±8                        | 0.90 |
| Heart beats (beats/min)    | 74±10                                     | 70±9                        | 0.13 |
| Total cholesterol (mmol/l) | 5.3±0.9                                   | 5.5±0.9                     | 0.44 |
| TAG (mmol/l)               | 1.6±0.8                                   | 1.6±0.6                     | 0.92 |
| LDLc (mmol/l)              | 3.1±0.8                                   | 3.3±0.8                     | 0.40 |
| HDLc (mmol/l)              | 1.4±0.3                                   | 1.4±0.4                     | 0.97 |
| Chol/HDLc                  | 3.8±0.8                                   | 4.0±1                       | 0.33 |
| Fasting glycemia (mmol/l)  | 5.9±0.4                                   | 5.9±0.4                     | 0.63 |
| 2h Glycemia (mmol/)        | 7.2±1.6                                   | 7.4±1.5                     | 0.60 |

BMI, Body Mass Index; SBP, Systolic Blood Pressure; DBP, Diastolic Blood Pressure; TAG, Total triglycerides; LDLc, Low Density Lipoprotein cholesterol; HDLc, High Density Lipoprotein cholesterol, Chol, Cholesterol.

Mean ± SD

P value to compare parameters between groups (placebo vs brown seaweed extract) at the screening, as performed by ANOVA.

**Supplemental Table S2. Nutritional intakes over time within and between groups**

|                          | Brown seaweed<br>extract (n = 27) |                         |                       | Placebo<br>(n = 29)    |                         |                       | <b>P<sub>IXG</sub><sup>2,3</sup></b> |
|--------------------------|-----------------------------------|-------------------------|-----------------------|------------------------|-------------------------|-----------------------|--------------------------------------|
|                          | <b>Pre<sup>1</sup></b>            | <b>Post<sup>1</sup></b> | <b>Pi<sup>2</sup></b> | <b>Pre<sup>1</sup></b> | <b>Post<sup>1</sup></b> | <b>Pi<sup>2</sup></b> |                                      |
| Energy (KJ)              | 9 971±737                         | 8 870±737               | 0.08                  | 10 666±712             | 9 059±720               | 0.05                  | 0.90                                 |
| % Carbohydrate           | 47±1                              | 47±1                    | 0.64                  | 46±1                   | 48±1                    | 0.02                  | 0.18                                 |
| % Protein                | 17±1                              | 18±1                    | 0.01                  | 17±1                   | 18±1                    | 0.22                  | 0.24                                 |
| % Fat                    | 35±1                              | 35±1                    | 0.63                  | 36±1                   | 35±1                    | 0.07                  | 0.34                                 |
| Saturated fatty acid (g) | 32±3                              | 27±3                    | 0.08                  | 35 ±3                  | 28 ± 3                  | 0.01                  | 0.63                                 |
| MUFA (g)                 | 37±3                              | 33±3                    | 0.09                  | 41±3                   | 34±3                    | 0.02                  | 0.66                                 |
| PUFA (g)                 | 18±1                              | 15±1                    | 0.08                  | 19±1                   | 15±1                    | 0.01                  | 0.48                                 |
| Trans fatty acid (g)     | 3.5±0.3                           | 3.1±0.3                 | 0.08                  | 4.0±0.3                | 3.2±0.3                 | 0.04                  | 0.83                                 |
| Cholesterol (g)          | 302±33                            | 297±33                  | 0.9                   | 340±32                 | 276±32                  | 0.11                  | 0.22                                 |
| Caffeine (g)             | 235±30                            | 224±30                  | 0.51                  | 172±29                 | 175±29                  | 0.83                  | 0.53                                 |
| Alcohol (g)              | 11±2                              | 6±2                     | 0.01                  | 12±2                   | 6±2                     | 0.01                  | 0.89                                 |
| Total fiber (g)          | 27±2                              | 27±2                    | 0.79                  | 29±2                   | 30±2                    | 0.36                  | 0.66                                 |
| Insoluble fiber (g)      | 18±1                              | 18±1                    | 0.78                  | 19±1                   | 20±1                    | 0.30                  | 0.59                                 |
| Physical activity (MET)  | 2502±429                          | 1970±429                | 0.25                  | 1936±407               | 1622±414                | 0.86                  | 0.48                                 |

MUFA, Monounsaturated Fatty Acid; PUFA, Polyunsaturated Fatty Acid.

1. Mean ± SD pre-intervention (at the beginning of the 12-week trial) and post-intervention (at the end of the 12-week trial)

2. *P value* to compare changes over time from the baseline to 12 weeks (Pre vs Post) within each group (placebo or brown seaweed extract), as performed by repeated-measures ANOVA test with two factors (treatment, post-pre phase).

3. *P value* interaction to compare change over time (Pre vs Post) between groups (placebo vs brown seaweed extract).

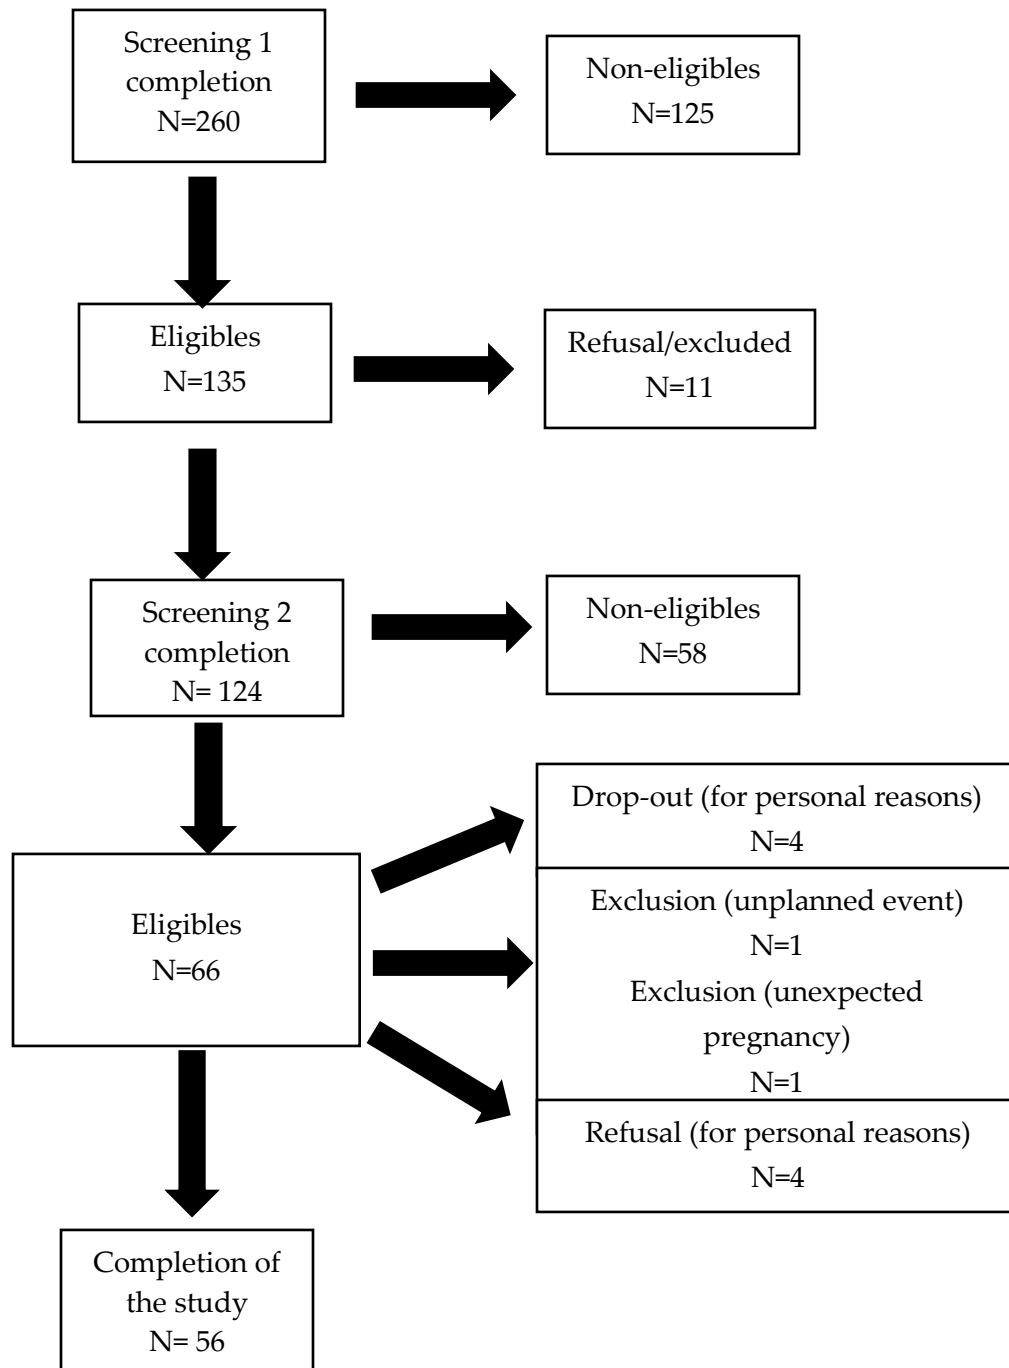

Supplementary Figure S1. Flow chart.
